# Supplementary material for: High-efficiency solid-state quantum dot sensitized solar cells based on black TiO 2 and an activated carbon electrode
Source: Royal Society of Chemistry journal article supplement (doi:10.1039/d5ta02425k), 2025-01-01
Supplement: d5ta02425k1.pdf [file d5ta02425k1.pdf]

## Supplementary Information

*Yin Peng<sup>1</sup>, Rui Zhou<sup>1</sup>, Liying Wang<sup>1</sup>, Yang Gao<sup>1</sup>, Xuesong Li<sup>1</sup>, Xijia Yang<sup>1\*</sup>, Wei*

*Lü<sup>1,2\*</sup>*

<sup>1</sup>Key Laboratory of Advanced Structural Materials, Ministry of Education &

Advanced Institute of Materials Science, and School of Materials Science and

Engineering, Changchun University of Technology, Changchun 130012, China

<sup>2</sup>State Key Laboratory of Luminescence and Applications, Changchun Institute of

Optics, Fine Mechanics and Physics, Chinese Academy of Sciences, Changchun

130033, China

E-mail: [lw771119@hotmail.com](mailto:lw771119@hotmail.com), [yangxijia@ccut.edu.cn](mailto:yangxijia@ccut.edu.cn)

Fax: +86-0431-85716426; Tel: +86-0431-85716421

\* To whom all correspondence should be addressed.

## 1 Experimental section

### 2 1. Preparation of black TiO<sub>2</sub>:

3 TiO<sub>2</sub> and NaBH<sub>4</sub> were mixed in a 4:1 ratio in a grinding bowl, thoroughly blended,  
4 and annealed at 400°C for 1 hour in a tube furnace. After centrifugation with deionized  
5 water and ethanol, the powder yielded black TiO<sub>2</sub> (R-P25). Additionally, TiO<sub>2</sub> powder  
6 was dispersed in a mixture of methanol and deionized water (volume ratio 7:3).  
7 Following methods described in the literature, the mixture was irradiated using a Ti-  
8 sapphire laser system (Spectra-Physics, Spitfire ACE). After drying, laser-modified  
9 black TiO<sub>2</sub> (L-P25) was obtained.

### 10 2. Preparation of photoanode

11 Mixtures of 0.4g each of R-P25 and L-P25 powders (in mass ratios of 3:7, 5:5, and  
12 7:3 respectively) were prepared into slurries using the previously described method.  
13 These slurries were spin-coated onto FTO conductive glass and annealed at 450°C for  
14 30 minutes to obtain TiO<sub>2</sub> films.

15 The CdS/CdSe QD were sensitized onto the FTO/TiO<sub>2</sub> photoanode using a  
16 chemical bath deposition method. The FTO/TiO<sub>2</sub> photoanode was sequentially  
17 immersed in a methanol solution containing 0.06 M Cd(CH<sub>3</sub>COO)<sub>2</sub> and a methanol  
18 solution containing 0.06 M Na<sub>2</sub>S · 9H<sub>2</sub>O. After soaking for 30 seconds, the photoanode  
19 was removed and rinsed appropriately with methanol. This process was repeated six  
20 times to complete the CdS quantum dot sensitization.

21 Next, in a three-neck flask, 25 mL of deionized water, 1.55 g Na<sub>2</sub>SO<sub>3</sub>, and 0.155  
22 g Se powder were added, and the mixture was heated in an oil bath to 125°C until the

1 Se powder was completely dissolved. The temperature was then maintained at 125°C  
2 for 2 h, after which the flask was removed from the oil bath and cooled to room  
3 temperature. A solution containing  $\text{C}_6\text{H}_6\text{NNa}_3\text{O}_6 \cdot \text{H}_2\text{O}$  and  $\text{Cd}(\text{CH}_3\text{COO})_2$  in deionized  
4 water was added, and the mixture was stirred before the FTO/ $\text{TiO}_2$ /CdS photoanode  
5 was placed in it. The photoanode was then kept in the dark at 24°C in a water bath for  
6 2 h.

7 Finally, a ZnS passivation layer was prepared. The prepared photoanode was  
8 sequentially immersed in 0.1 M  $\text{Zn}(\text{CH}_3\text{COO})_2$  methanol solution and 0.1 M  $\text{Na}_2\text{S}$   
9 methanol-deionized water (V/V, 1:1) solution. After soaking for 60 s, the photoanode  
10 was removed and rinsed with methanol. This process was repeated twice, and then the  
11 photoanode was placed in a petri dish and stored in the dark.

12 According to the passivation layer design specifications, the target thickness range  
13 is 20-30 nm. The measured passivation layer thickness, characterized by transmission  
14 electron microscopy (TEM), is  $21 \pm 1.5 \text{ nm}^1$ , which meets the requirements of the work  
15 performed.

### 16 **3. Synthesis of AM gel electrolytes**

17 12 g AM were dispersed in 15 mL of deionized water, heated and stirred until fully  
18 dissolved. After complete dissolution, 0.1 g of N, N'-(methylene) bisacrylamide and 0.2  
19 g of ammonium persulfate were added. After stirring for several minutes, the mixture  
20 became a viscous system. Subsequently, it was poured into a petri dish and left at room  
21 temperature for 24 h to obtain a AM matrix.

22 To prepare the polysulfide electrolyte, sulfur powder and sodium sulfide were

1 dissolved in a mixture of deionized water and methanol. The electrolyte was then added  
2 to the AM matrix, allowed to fully absorb, resulting in the formation of the AM gel  
3 electrolyte.

#### 4 **4. Preparation of Carbon/Ti Counter Electrodes**

5 The Ti mesh was cut into an appropriate size and placed in ethanol and acetone  
6 respectively for ultrasonic cleaning. After the ultrasonic treatment, the Ti mesh was  
7 rinsed with deionized water. The cleaned Ti mesh was then dried for later use.

8 Active carbon, conductive carbon black, and PVDF were mixed in a ratio of 8:1:1,  
9 and NMP was added to thoroughly grind the mixture into a viscous slurry. The slurry  
10 was then brushed onto the titanium mesh. After drying, the active carbon/Ti counter  
11 electrode was obtained.

#### 12 **5. Characterization**

13 The equipment used for experiments and data analysis in this research:

14 X-ray Diffraction (Rigaku XRD):  $\lambda = 0.15406$  nm, tube current = 40 mA, diffraction  
15 angle =  $10^{\circ}$ - $80^{\circ}$ ; X-ray Photoelectron Spectroscopy (XPS, ESCALAB MkII); Field  
16 Emission Scanning Electron Microscope (FESEM, S4800, Hitachi); UV/Visible/NIR  
17 Spectrophotometer (UV-3150); Solar Simulator (Zolix Instruments Co., Ltd.): AM1.5,  
18 light intensity =  $100 \text{ mW/cm}^2$ ; Transmission Electron Microscope (TEM, Talos F200):  
19 Accelerating voltage = 200 kV; Electrochemical Workstation (Shanghai CHI660C).

20 These methods are used for parameter determination and structural analysis.

#### 21 **6. Analog calculation**

1 Utilizing density functional theory calculations and molecular dynamics  
2 simulations to compute the interactions between AM, NaS, S, and H<sub>2</sub>O. The wave  
3 function expansion employed a cutoff energy of 500 eV, and the energy convergence  
4 criterion was set to 10<sup>-6</sup> eV to ensure high calculation precision. The exchange and  
5 correlation terms were treated with the Generalized Gradient Approximation (GGA)  
6 Perdew-Burke-Ernzerhof (PBE) functional. The Brillouin zone integrations were  
7 carried out using a 3×3×2 K-point grid. When constructing the simulation model, a 15  
8 Å thick vacuum layer was set around the carbon-based materials to avoid interactions.  
9 The study of the interactions between the polymer and water was conducted using the  
10 Forcite module for molecular dynamics calculations and analysis.

11

12

13

14

15

16

17

18

19

20

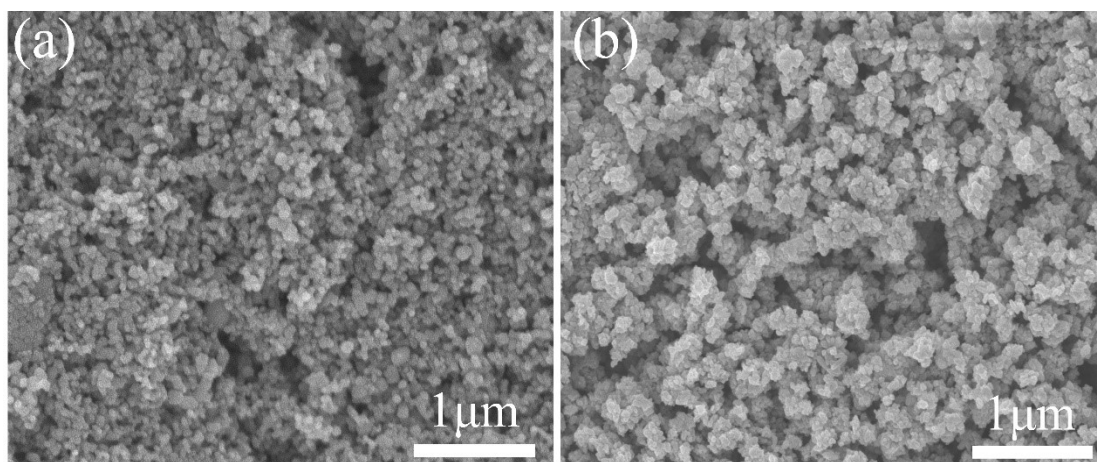

**Fig. S1** SEM images in top view of two TiO<sub>2</sub> nanoparticle films(a-b)

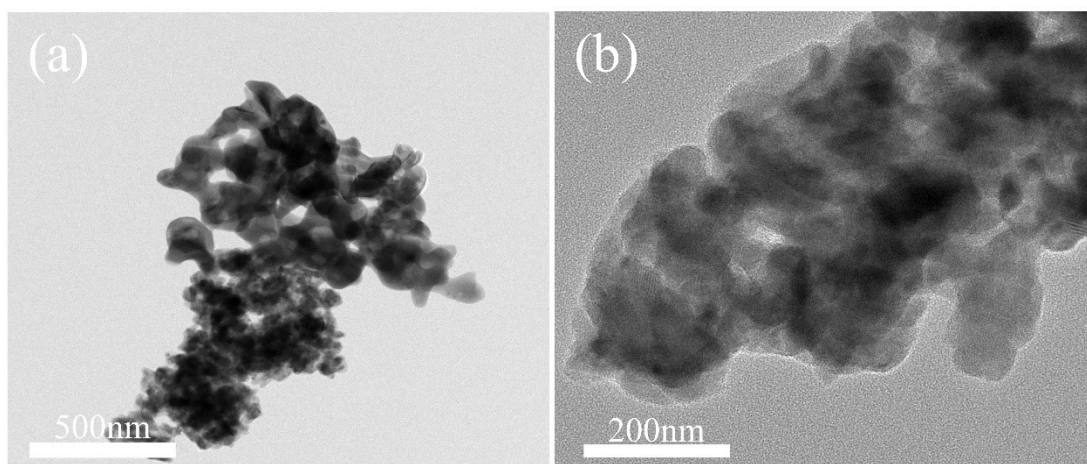

**Fig. S2** TEM images of P25 TiO<sub>2</sub>(a-b)

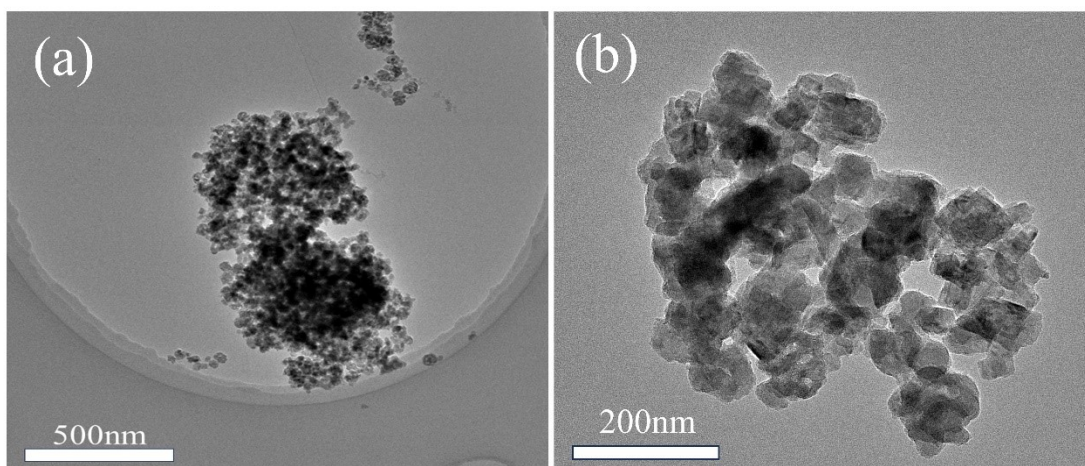

**Fig. S3** TEM images of R-P25(a-b)



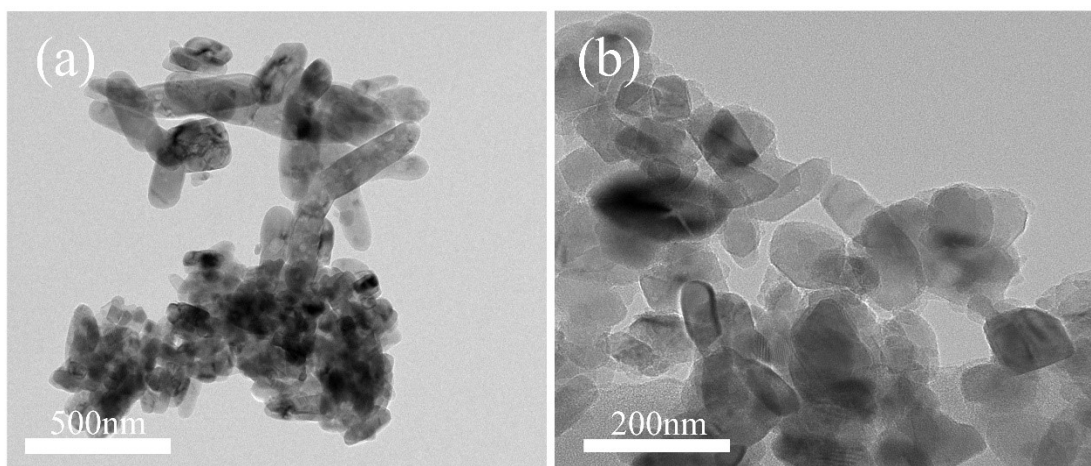

**Fig. S4** The TEM images of L-P25 TiO<sub>2</sub>(a-b)

1 The photoanodes were prepared using the pristine P25, L-P25, and R-P25.  
2 Additionally, L-P25 and R-P25 were mixed in ratios of 3:7, 5:5, and 7:3 to prepare  
3 photoanodes.

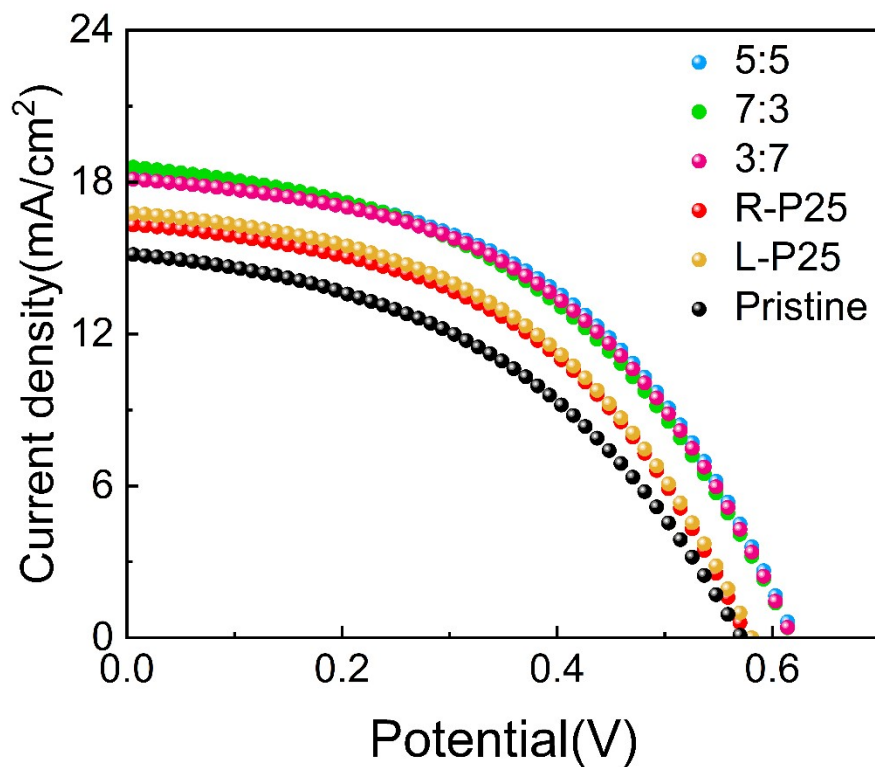

4  
5 **Fig. S5** The J-V curves of QDSSCs prepared using different photoanodes based on CuS CE.

6  
7 **Table S1.** Performance parameters of five solar cells based on CuS

| Sample       | Jsc(mA/cm <sup>2</sup> ) | Voc(V) | FF(%) | PCE(%) |
|--------------|--------------------------|--------|-------|--------|
| Pristine P25 | 15.23                    | 0.57   | 43    | 3.80   |
| R-P25        | 16.35                    | 0.58   | 48    | 4.53   |
| L-P25        | 16.84                    | 0.58   | 47    | 4.58   |
| 3:7          | 18.52                    | 0.60   | 46    | 5.35   |
| 5:5          | 18.34                    | 0.61   | 48    | 5.47   |
| 7:3          | 18.70                    | 0.60   | 45    | 5.28   |

8

9

10

11

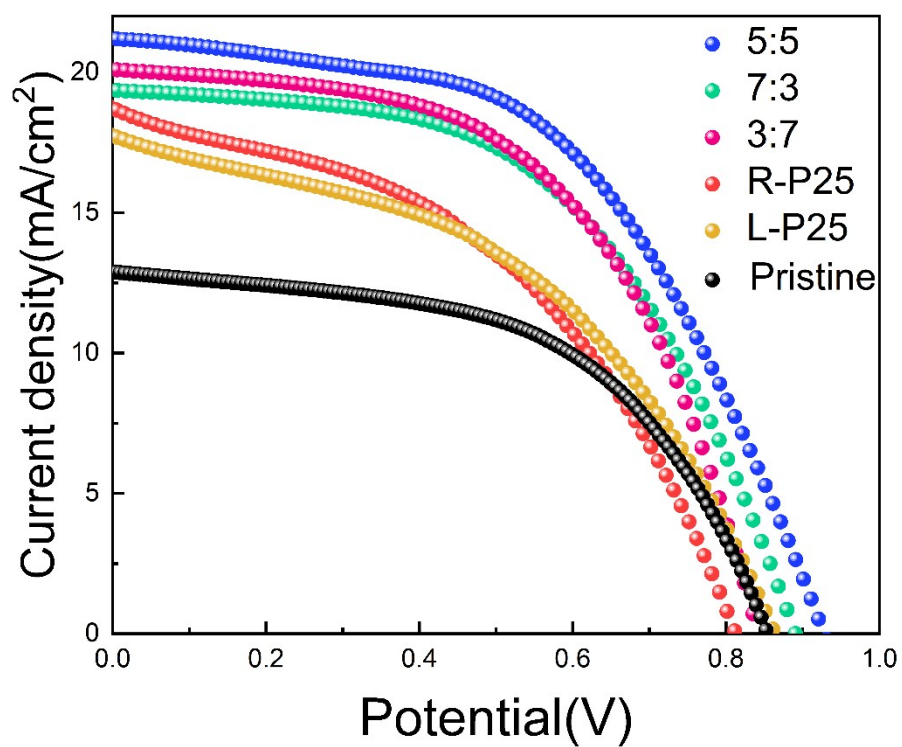

**Fig. S6** The J-V curves of QDSSCs prepared with different photoanodes based on liquid electrolyte

**Table S2.** Performance parameters of five solar cells based on liquid electrolyte

| Sample       | Jsc(mA/cm <sup>2</sup> ) | Voc(V) | FF(%) | PCE(%) |
|--------------|--------------------------|--------|-------|--------|
| Pristine P25 | 12.75                    | 0.85   | 50    | 6.12   |
| R-P25        | 17.93                    | 0.81   | 46    | 7.14   |
| L-P25        | 16.94                    | 0.86   | 47    | 7.35   |
| 3:7          | 20.10                    | 0.84   | 48    | 8.85   |
| 5:5          | 22.51                    | 0.97   | 46    | 9.98   |
| 7:3          | 19.47                    | 0.89   | 49    | 8.63   |

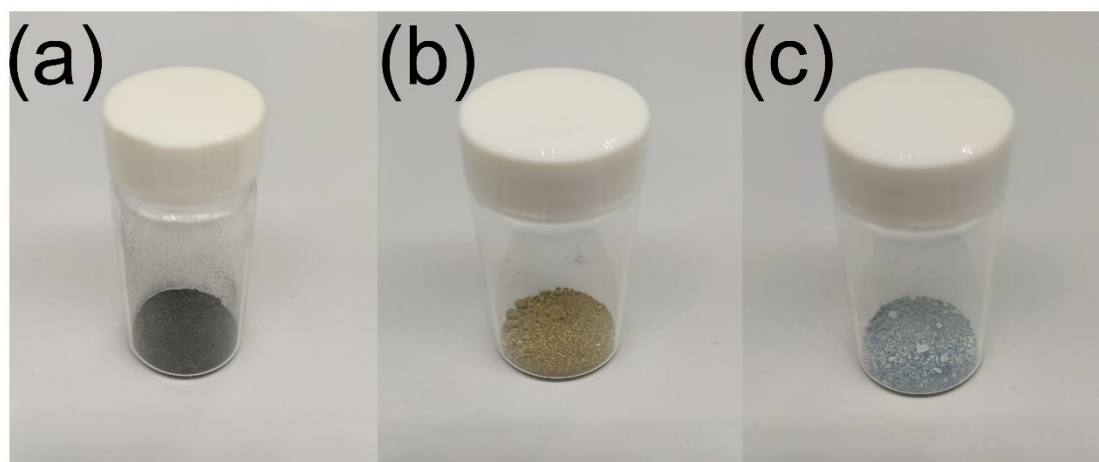

**Fig. S7** Digital photos of black  $\text{TiO}_2$  before(a) and after annealing (b, c).

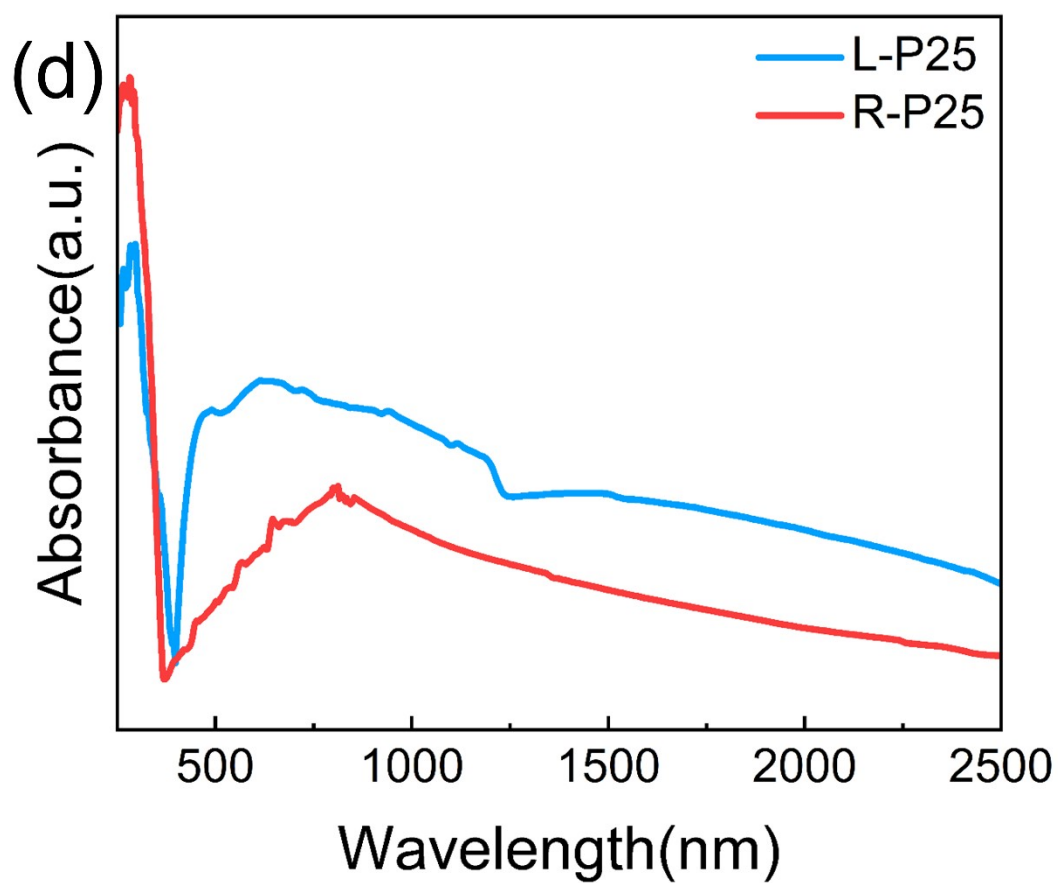

1

2

3

**Fig. S8** The light absorption spectra of the two black TiO<sub>2</sub> powders after annealing.

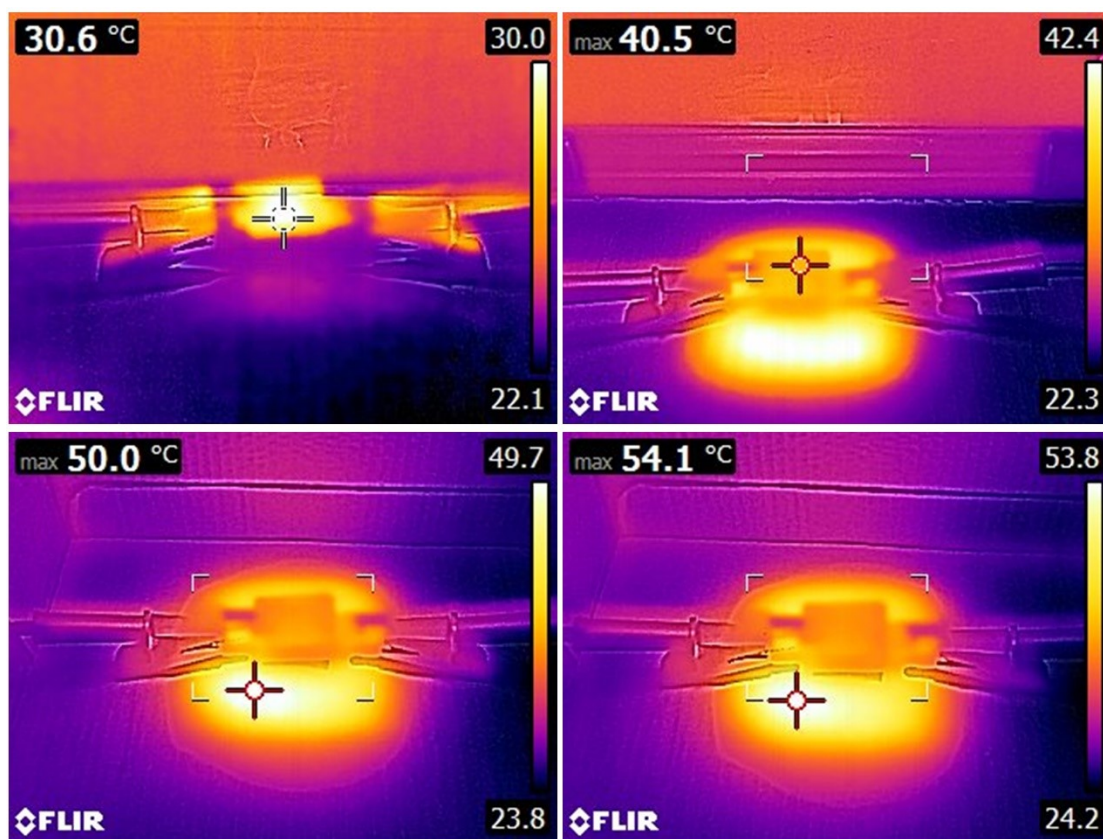

Fig. S9 Infrared thermal images at different temperatures.

## 1 Reference

- 2 1. C. Zhou, Q. Chen, G. Wang, A. Guan, L. Zhou, N. Huang and J. Xu, *Journal of*  
3 *Electroanalytical Chemistry*, 2016, **780**, 271-275.

4
